# Supplementary material for: Self-assembly of P-chiral supramolecular phosphines on rhodium and direct evidence for Rh-catalyst-substrate interactions
Source: Royal Society of Chemistry journal article supplement (doi:10.1039/c7dt02923c), 2017-01-01
Supplement: c7dt02923c1.pdf [file c7dt02923c1.pdf]

# Supporting Information

## Self-assembly of P-chiral supramolecular phosphine on rhodium and a direct evidence for Rh-catalyst-substrate

Vijay S. Koshti,<sup>[a]</sup> Anirban Sen,<sup>[a]</sup> Dinesh Shinde,<sup>[b]</sup> and Samir H. Chikkali<sup>\*,[a,c]</sup>

<sup>a</sup>Polymer Science and Engineering Division, CSIR-National Chemical Laboratory, Dr. Homi Bhabha Road, Pune-411008, India. Fax: (+) 91 20 25902615; E-mail: [s.chikkali@ncl.res.in](mailto:s.chikkali@ncl.res.in); Homepage: <http://academic.ncl.res.in/s.chikkali/home>

<sup>b</sup>Center NMR facility, CSIR-National Chemical Laboratory, Dr. Homi Bhabha Road, Pune-411008, India.

<sup>c</sup>*Academy of Scientific and Innovative Research (AcSIR), Anusandhan Bhawan, 2 Rafi Marg, New Delhi 110001, India.*

### Contents

|                                                                        |    |
|------------------------------------------------------------------------|----|
| 1. Experiment section .....                                            | 2  |
| 2. Demonstrating the self-assembly .....                               | 2  |
| 2.1 Effect of concentration on H-bonding in L1:.....                   | 2  |
| 2.2 Effect of concentration on H-bonding in C1: .....                  | 3  |
| 2.3 Effect of temperature on H-bonding in L1:.....                     | 5  |
| 2.4 Effect of temperature on H-bonding in C1: .....                    | 5  |
| 3. Synthesis of deuterated supramolecular phosphine ligand (L1.D)..... | 7  |
| 4. Synthesis of deuterated self-assembled Rh-complex (C1.D) .....      | 10 |
| 5. Stoichiometric study of self-assembled Rh-complex and S2 .....      | 13 |
| 6. References: .....                                                   | 17 |

## 1. Experiment section

All manipulations were carried out under an inert atmosphere using standard Schlenk line techniques or m-Braun glove box. Solvents were dried by standard procedure.<sup>1</sup> THF distilled from sodium/benzophenone under argon atmosphere. Acetonitrile and methylene chloride were distilled on calcium-hydride. [(COD)<sub>2</sub>RhBF<sub>4</sub>] and *N*-acetyldehydrophenylalanine were purchased from Sigma-Aldrich All other reagents/chemicals, solvents were purchased from local suppliers (Spectrochem Pvt. Ltd.; Avra Synthesis Pvt. Ltd.; Thomas Baker Pvt. Ltd. etc). The asymmetric hydrogenation was run in an Amar Equipment high pressure autoclave equipped with inlet/outlet and pressure regulators.

Solution NMR spectra were recorded on a Bruker Avance 400 and 500 MHz instruments at 298 K unless mentioned otherwise. Chemical shifts are referenced to external reference TMS (<sup>1</sup>H and <sup>13</sup>C). Coupling constants are given as absolute values. Multiplicities are given as follows s: singlet, d: doublet, t: triplet, m: multiplet, br: broad. FT-IR spectra were recorded on a Bruker  $\alpha$ -T spectrophotometer in the range of 4000-400 cm<sup>-1</sup> by using CaF<sub>2</sub> pallets. Mass spectra were recorded on Thermo scientific Q-Exactive mass spectrometer. Synthesis of self-assembled Rh-complex according to our previous report.<sup>2</sup>

## 2. Demonstrating the self-assembly

### 2.1 Effect of concentration on H-bonding in L1:

In a NMR tube 0.0017 g (0.005 mmol) of **L1** was dissolved in 0.5 ml of CDCl<sub>3</sub> to make 10 mM solution of **L1**. The <sup>1</sup>H NMR of 10 mM solution was recorded at 25 °C and chemical shift of NH and NH<sub>2</sub> protons was identified. Next, in the same NMR tube another 0.0017 g (0.005 mmol) of **L1** (to make 20 mM solution of **L1**) was added and proton NMR was recorded. In similar manner, 30 mM, 40 mM, and 50 mM solution of **L1** was prepared and <sup>1</sup>H NMR was measured. Table S1 summarizes the change in chemical shift of NH and NH<sub>2</sub> protons of **L1** with increasing concentrations.

**Table S1** : Monitoring the change in chemical shift of NH and NH<sub>2</sub> proton as a function of concentration of the **L1**.

| Sr. no. | L1 (g)          | L1 conc. (mM) | NH (ppm) | NH <sub>2</sub> (ppm) |
|---------|-----------------|---------------|----------|-----------------------|
| 1       | 0.0017          | 10            | 6.43     | 4.59                  |
| 2       | 0.0017 + 0.0017 | 20            | 6.55     | 4.62                  |
| 3       | 0.0034 + 0.0017 | 30            | 6.66     | 4.65                  |
| 4       | 0.0050 + 0.0017 | 40            | 6.76     | 4.68                  |
| 5       | 0.0067 + 0.0017 | 50            | 6.85     | 4.70                  |

## 2.2 Effect of concentration on H-bonding in C1:

Along the same lines, in a NMR tube 0.0048 g (0.005 mmol) of **C1** was dissolved in 0.5 ml of CDCl<sub>3</sub> to make 10 mM solution of **C1**. The <sup>1</sup>H NMR of 10 mM solution was recorded at 25 °C and chemical shift of NH<sub>2</sub> protons was recorded. Next, in the same NMR tube another 0.0048 g (0.005 mmol) of **C1** (to make 20 mM solution of **C1**) was added and proton NMR was recorded. In similar manner, 30 mM, 40 mM, and 50 mM solution of **C1** was prepared and <sup>1</sup>H NMR was measured. Table S2 summarizes the change in chemical shift of NH and NH<sub>2</sub> protons of **C1** with increasing concentrations.

**Table S2** : Monitoring the change in chemical shift of NH<sub>2</sub> proton as a function of concentration of the **C1**.

| Sr. no. | self-assembled Rh-complex (g) | C1 conc. (mM) | NH <sub>2</sub> (ppm) |
|---------|-------------------------------|---------------|-----------------------|
| 1       | 0.0048                        | 10            | 5.15                  |
| 2       | 0.0048 + 0.0048               | 20            | 5.16                  |
| 3       | 0.0096 + 0.0048               | 30            | 5.17                  |
| 4       | 0.0144 + 0.0048               | 40            | 5.18 [(5.26+5.11)/2]  |
| 5       | 0.0192 + 0.0048               | 50            | 5.19 [(5.28+5.09)/2]  |

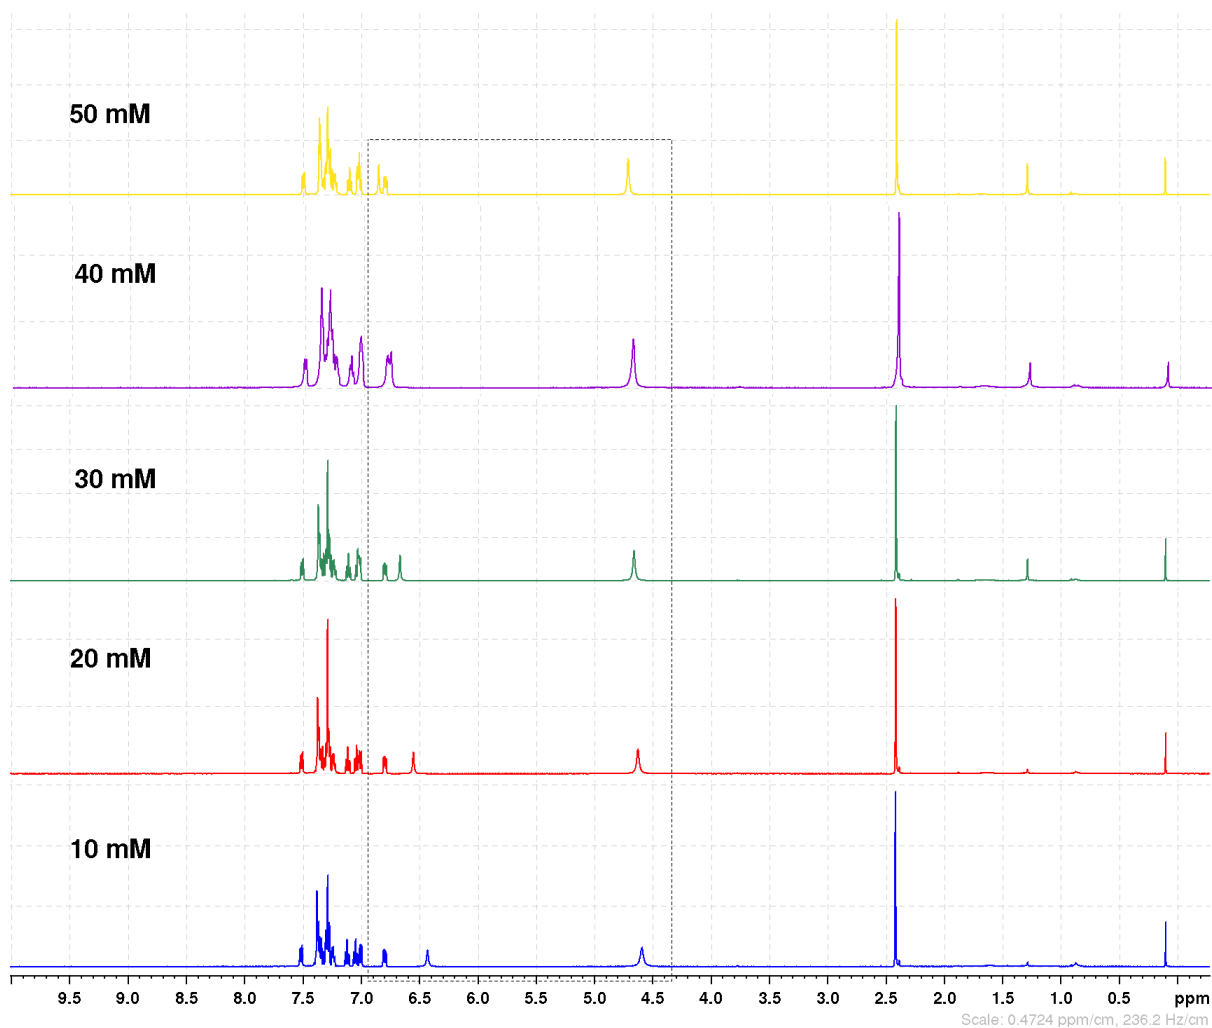

Fig. S1.  $^1\text{H}$  NMR spectra of P-stereogenic supramolecular phosphine (**L1**) at different concentration.

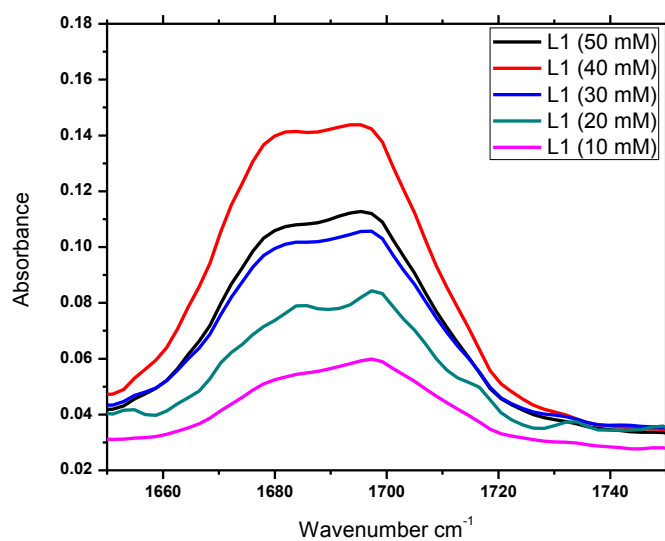

Fig. S2. IR spectra of P-stereogenic supramolecular phosphine (**L1**) at different concentration.

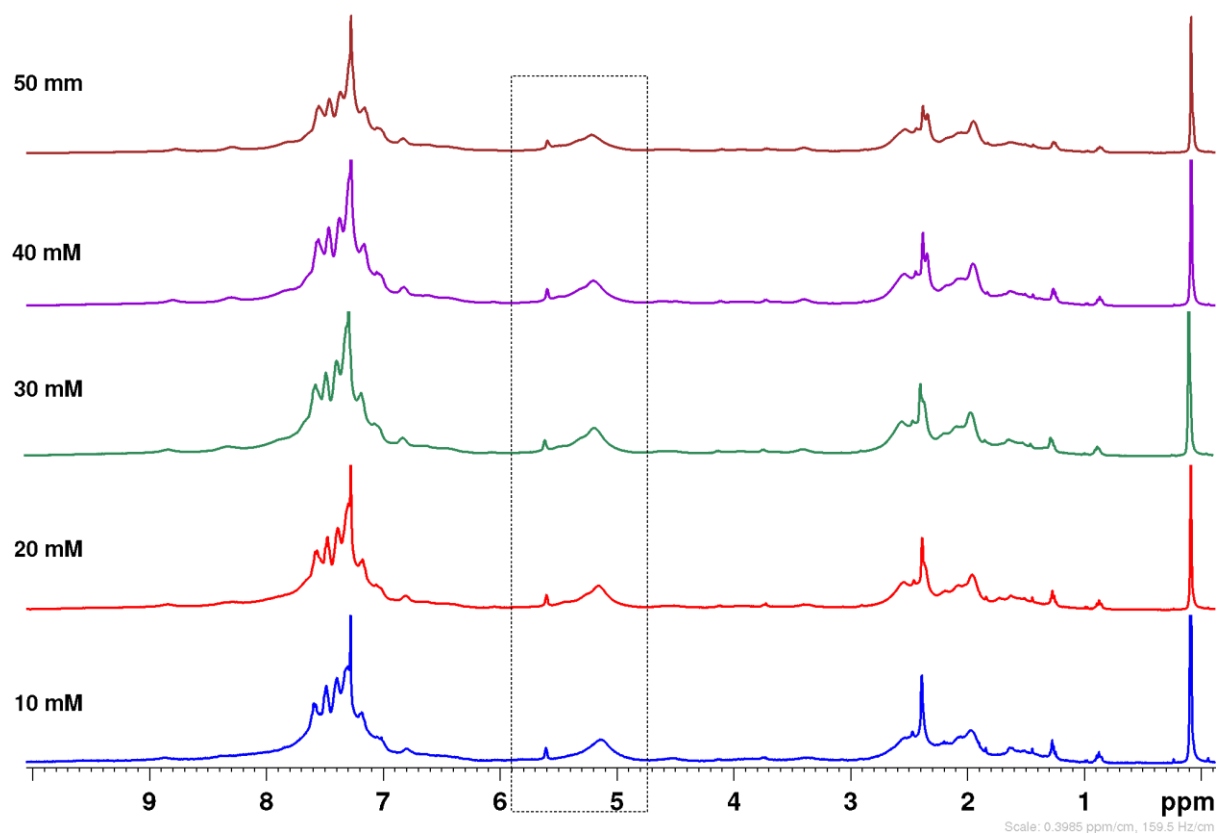

Fig. S3.  $^1\text{H}$  NMR spectra of self-assembled Rh-complex (**C1**) at different concentration.

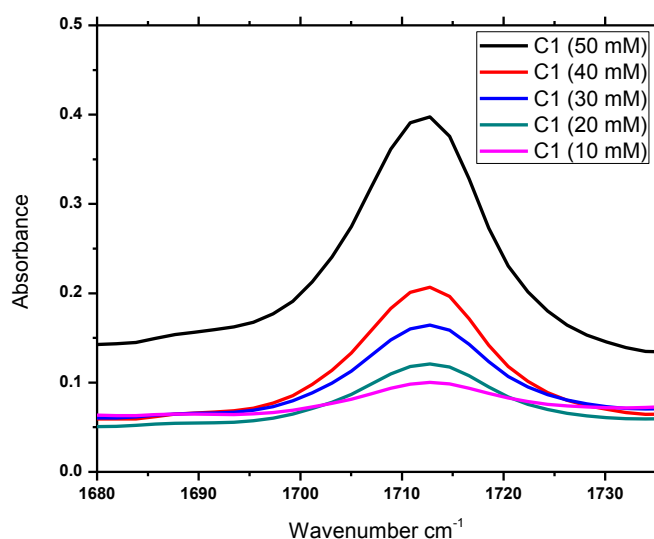

Fig. S4. IR spectra of **C1** at different concentration.

### 2.3 Effect of temperature on H-bonding in L1:

In the NMR tube 0.0017 g (0.005 mmol) of **L1** was dissolved in 0.5 ml of  $\text{CDCl}_3$  to make 10 mM solution. The  $^1\text{H}$  NMR was measured at different temperature starting from 298 K to 293K, 283 K, 273 K and 263 K. The change in chemical shift of the NH and  $\text{NH}_2$  protons as a function of decreasing temperature is summarized in Table S3.

**Table S3** : Monitoring the change in chemical shift of NH and  $\text{NH}_2$  proton as a function of temperature of the **L1**.

| Sr. no.        | Temperature (K) | L1 conc. (mM) | NH (ppm) | $\text{NH}_2$ (ppm) |
|----------------|-----------------|---------------|----------|---------------------|
| 1              | 298             | 10            | 6.37     | 4.55                |
| 2              | 293             | 10            | 6.43     | 4.58                |
| 3              | 283             | 10            | 6.50     | 4.62                |
| 4 <sup>a</sup> | 273             | 10            | 6.59     | 4.66                |
| 5 <sup>a</sup> | 263             | 10            | 6.69     | 4.70                |

### 2.4 Effect of temperature on H-bonding in C1:

Similarly, 0.0048 g (0.005 mmol) of **C1** was charged to the NMR tube which was the dissolved in 0.5 ml of  $\text{CDCl}_3$  to make a 10 mM solution of **C1**. The  $^1\text{H}$  NMR of this 10 mM solution was recorded at different temperatures starting from 298 K to 293K, 283 K, 273 K and 263 K. There was hardly any change in the chemical shift of  $\text{NH}_2$  proton as a function of decreasing temperature and Table S4 presents the change in chemical shift as a function of temperature.

**Table S4** : Monitoring the change in chemical shift of NH and  $\text{NH}_2$  proton as a function of temperature of the **C1**.

| Sr. no. | C1 conc. (mM) | Temperature (K) | $\text{NH}_2$ (ppm) |
|---------|---------------|-----------------|---------------------|
| 1       | 10            | 298             | 5.12                |

|   |    |     |      |
|---|----|-----|------|
| 2 | 10 | 293 | 5.13 |
| 3 | 10 | 283 | 5.14 |
| 4 | 10 | 273 | 5.18 |
| 5 | 10 | 263 | 5.19 |

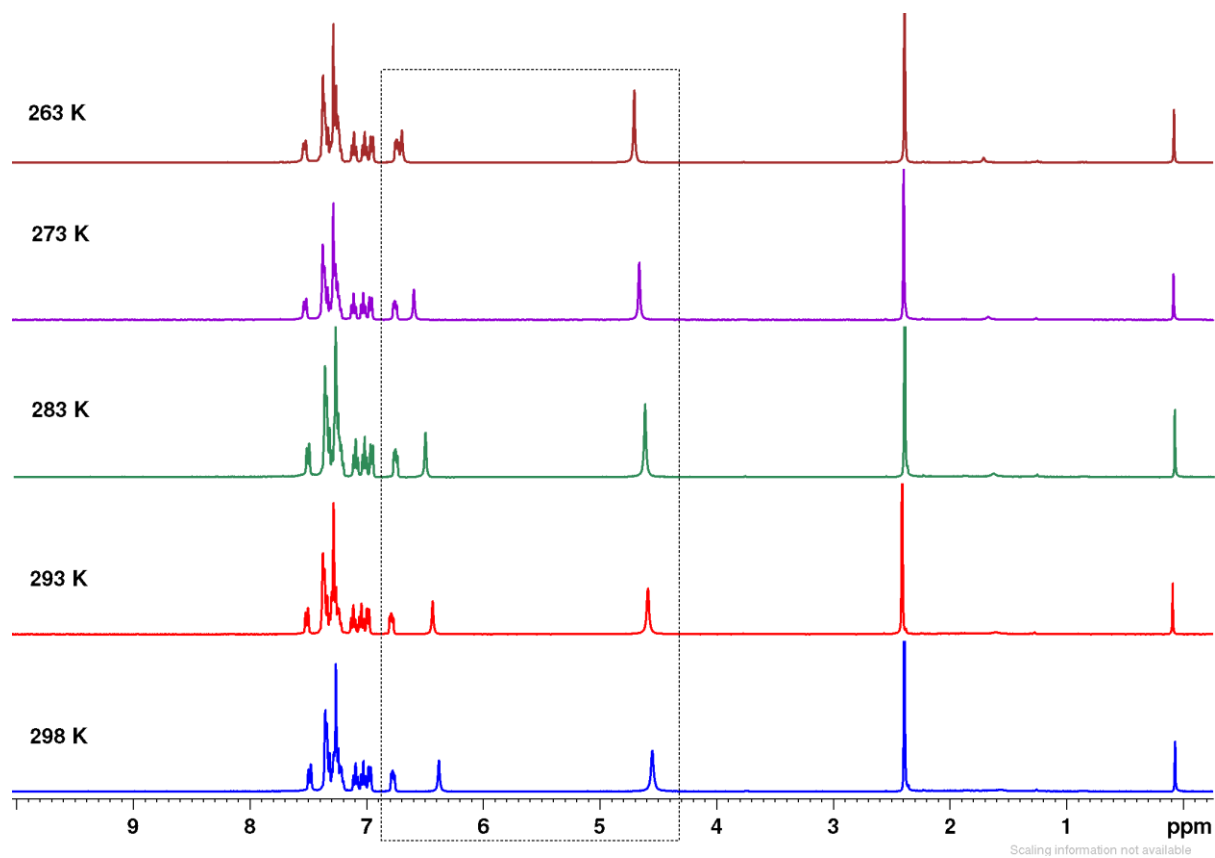

Fig S5.  $^1\text{H}$  NMR spectra of **L1** at different temperature.

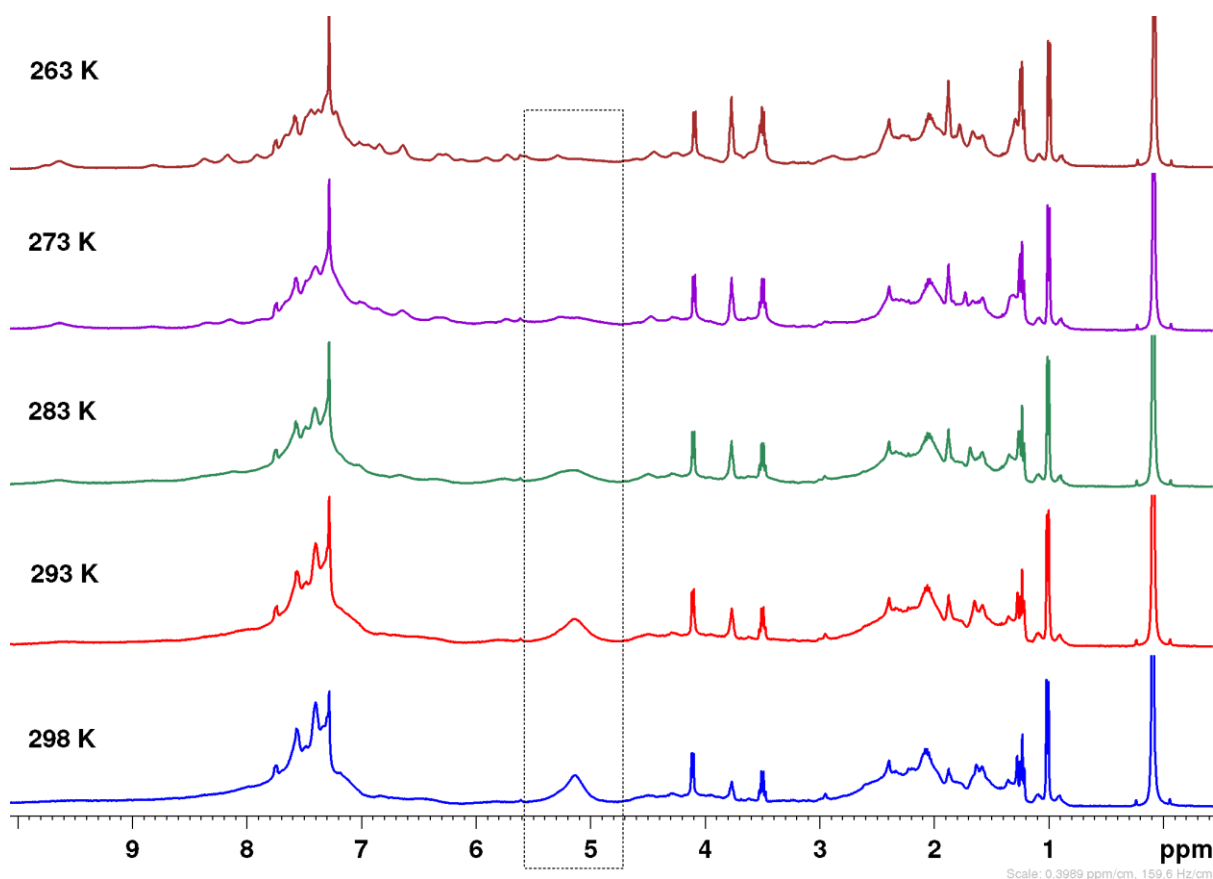

Fig S6.  $^1\text{H}$  NMR spectra of **C1** at different temperature.

### 3. Synthesis of deuterated supramolecular phosphine ligand (L1.D)

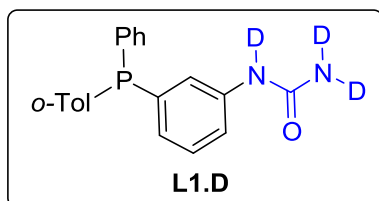

In the 50 ml Schlenk flask 0.136 g (0.4 mmol) of ligand **L1** was dissolved in 2 ml  $\text{CD}_3\text{OD}$ . The above reaction solution was stirred for 2.5 hours at room temperature. The progress of their action was monitored by  $^1\text{H}$  NMR spectroscopy. After the reaction was complete, volatiles were evaporated under vacuum. The residue was dried under high vacuum and  $^1\text{H}$  NMR was recorded in  $\text{CDCl}_3$  (Fig. S7-S10).  $^2\text{H}$  NMR was recorded in 0.5 ml THF (THF- $d_8$ :THF, 0.1:0.4 ml). (ESI Fig. S7-S11).

$^2\text{H}$  NMR (500 MHz, THF- $d_8$ , 298 K)  $\delta$  = 7.87 (s, *ND*), 5.45 (s, *ND2*).  $^1\text{H}$  NMR (500 MHz,  $\text{CDCl}_3$ , 298 K)  $\delta$  = 7.45 (d,  $J$  = 7.25 Hz, 1H, Ar), 7.33 (br. s., 3H, Ar), 7.16 - 7.30 (m, 5H, Ar), 7.04 - 7.14 (m, 2H, Ar), 6.97 (t,  $J$  = 6.87 Hz, 1H, Ar), 6.74 - 6.84 (m, 1H, Ar), 4.85 (d,  $J$  = 5.34 Hz, 0.80H, *NH*), 2.39 (s, 3H,  $\text{CH}_3$ ).  $^{13}\text{C}$  NMR (126 MHz,  $\text{CDCl}_3$ , 298 K)  $\delta$  = 156.6 (s, *CO*), 142.3 (s, Ar), 142.1 (s, Ar), 138.7 (t,  $J$  = 7.7Hz, Ar), 137.7 (d,  $J$  = 10.5 Hz, Ar), 135.9 (d,  $J$  = 10.4 Hz, Ar), 135.5 (d,  $J$  = 11.5

Hz, Ar), 133.5 (d,  $J = 20.1$  Hz, Ar), 132.7 (s, Ar), 130.4 (s, Ar), 130.1 (d,  $J = 4.8$  Hz, Ar), 129.4 (d,  $J = 7.6$  Hz, Ar), 129.2 (d,  $J = 18.2$  Hz, Ar), 128.8 (d,  $J = 8.5$  Hz, Ar), 128.6 (d,  $J = 6.6$  Hz, Ar), 126.0 (s, Ar) 125.4 (d,  $J = 20.9$  Hz, Ar), 120.5 (d,  $J = 20.4$  Hz, Ar), 21.10 (d,  $J = 21.1$  Hz,  $CH_3$ ). **ESI-MS** (+ve) (For  $M = C_{20}H_{19}N_2OP$ )  $m/z = 335.13 [M+H]^+$ .

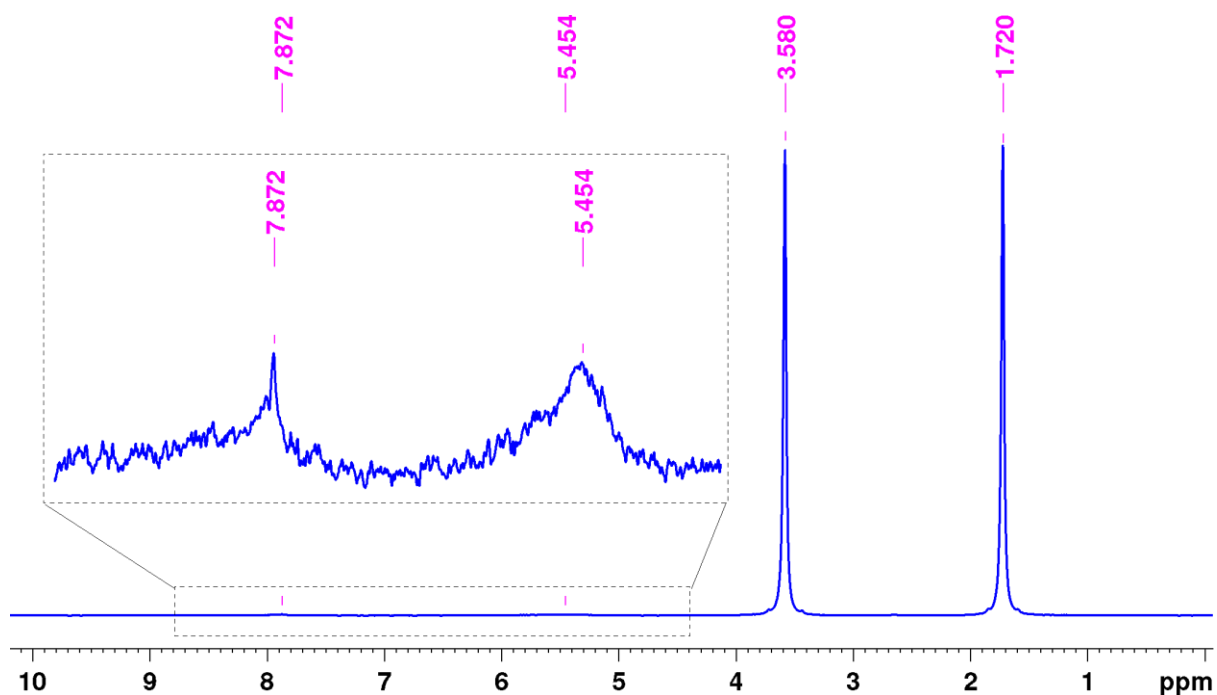

Fig. S7.  $^2H$  NMR spectrum of **L1.D** in THF- $D_8$ :THF (0.1:0.4 ml) solvent.

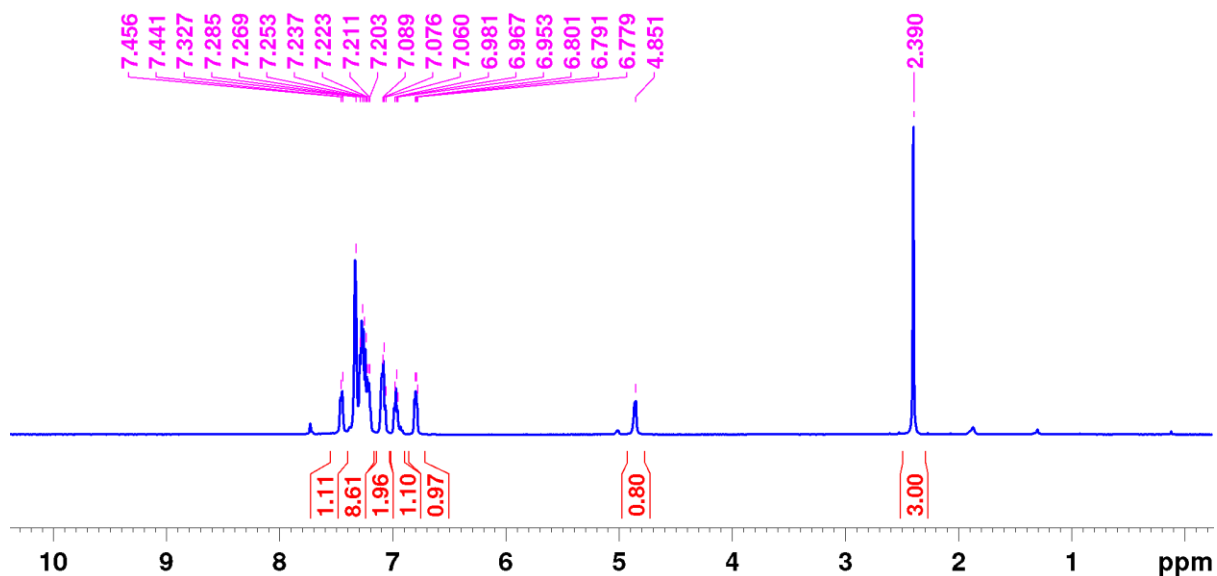

Fig. S8.  $^1H$  NMR spectrum of **L1.D** in  $CDCl_3$ .



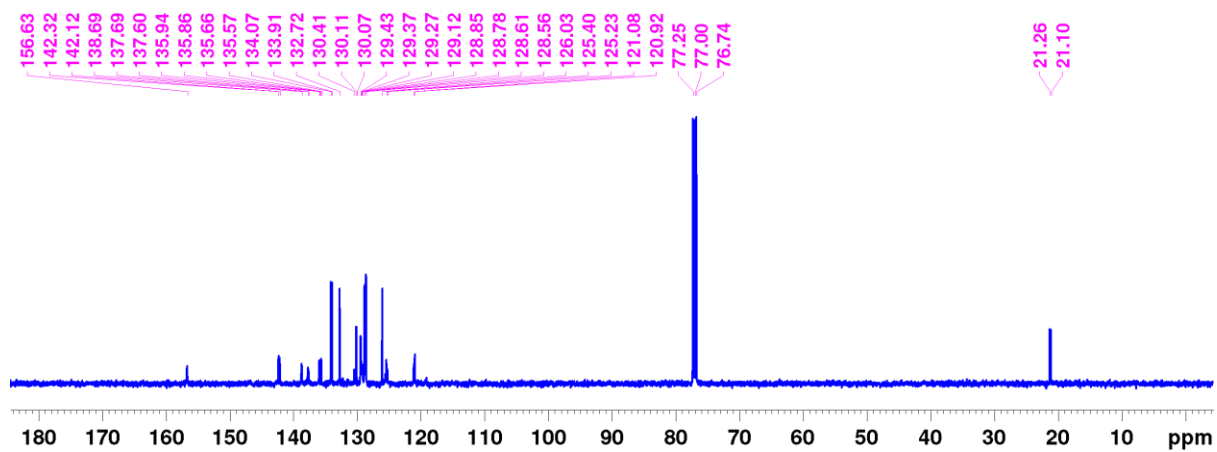

Fig. S9.  $^{13}\text{C}$  NMR spectrum of **L1.D** in  $\text{CDCl}_3$ .

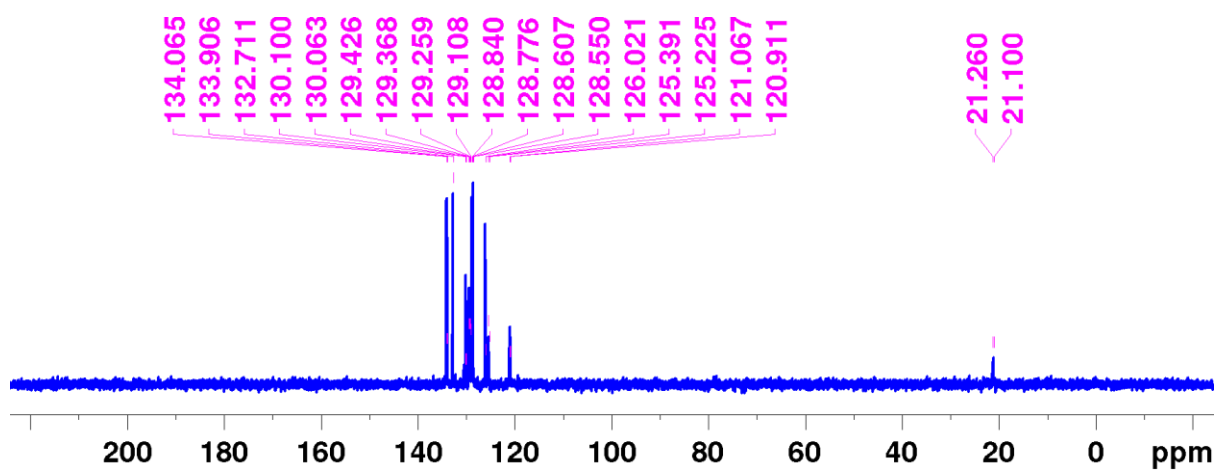

Fig. S10.  $^{13}\text{C}$  NMR (DEPT) spectrum of **L1.D** in  $\text{CDCl}_3$ .

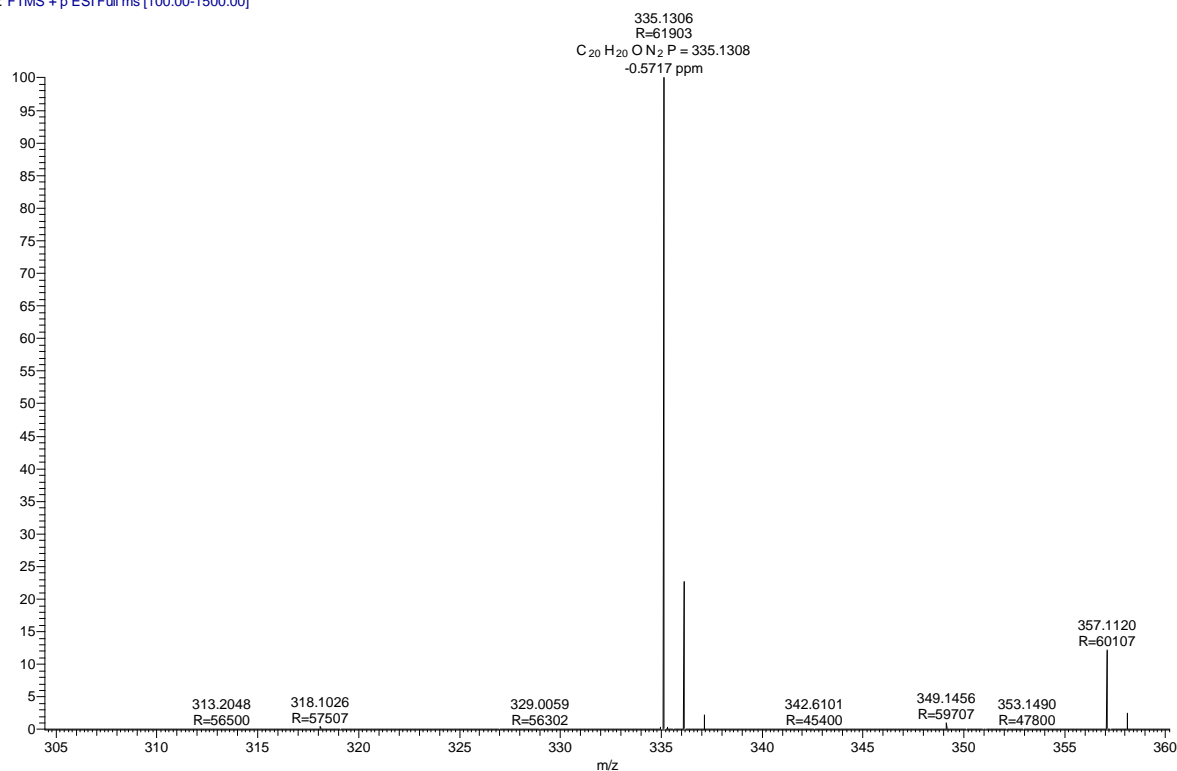

Fig. S11. ESIMS (+ve mode) spectrum of **L1.D**.

#### 4. Synthesis of deuterated self-assembled Rh-complex (**C1.D**)

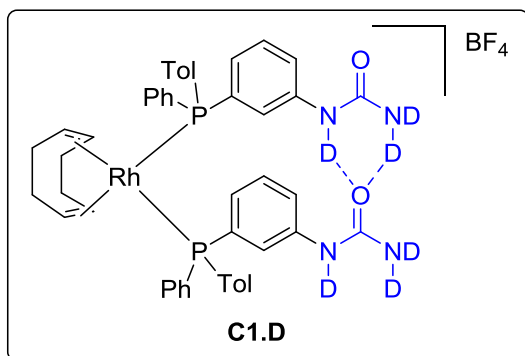

In a vacuum dried Schlenk flask  $[\text{Rh}(\text{COD})_2\text{BF}_4]$  (1 eqv., 0.0985 mmol) and phosphine ligand **L1.D** (2 eq., 0.1974 mmol) was taken inside the glove box. The above mixture was dissolved in 8 ml DCM and reaction content was stirred for 2 hours at room temperature. After completion of

reaction, the reaction content was evaporated and concentrated to 2 ml. 20 ml diethyl ether was added to above content to obtain yellow coloured precipitate. The resultant solid was separated by cannula filtration, washed with diethyl ether (10 ml x 3 ml) and dried under vacuum. The resultant residue was identified as **C1.D** after complete characterization (see fig. ESI S12-S16).

$^2\text{H}$  NMR (500 MHz, THF- $d_8$ , 298 K)  $\delta$  = 8.29 (s, ND), 5.55 (s, ND2).  $^1\text{H}$  NMR (400 MHz,  $\text{CDCl}_3$ , 298 K)  $\delta$  = 8.23-6.00 (m 26H, Ar), 5.75-4.95 (m, 5H, CH), 2.90-2.14 (m, 8H,  $\text{CH}_2$ ), 2.14 (m, 6H,  $\text{CH}_3$ ).  $^{13}\text{C}$  NMR (101 MHz,  $\text{CDCl}_3$ , 298 K)  $\delta$  = 157.3 (s, CO), 156.8 (s, CO), 142.8 (s, Ar), 141.7 (s, Ar), 140.1 (s, Ar), 139.6 (s, Ar), 132.6 (s,

Ar), 132.2 (s, Ar), 131.7 (s, Ar), 131.6 (s, Ar), 130.5 (s, Ar), 130.0 (s, Ar), 128.6 (s, Ar), 126.0 (s, Ar), 125.6 (s, Ar), 125.4 (s, Ar), 123.0 (s, Ar), 121.6 (s, Ar), 118.7 (s, CH), 104.4 (s, CH), 65.7 (s, CH<sub>2</sub>), 47.2 (s, CH<sub>2</sub>), 32.6 (s, CH<sub>2</sub>), 27.9 (s, CH<sub>2</sub>), 23.5 (s, CH<sub>3</sub>), 21.5 (s, CH<sub>3</sub>). **ESI-MS** (+ve) (For M = C<sub>48</sub>H<sub>50</sub>N<sub>4</sub>O<sub>2</sub>P<sub>2</sub>Rh) m/z = 879.24 [M]<sup>+</sup>.

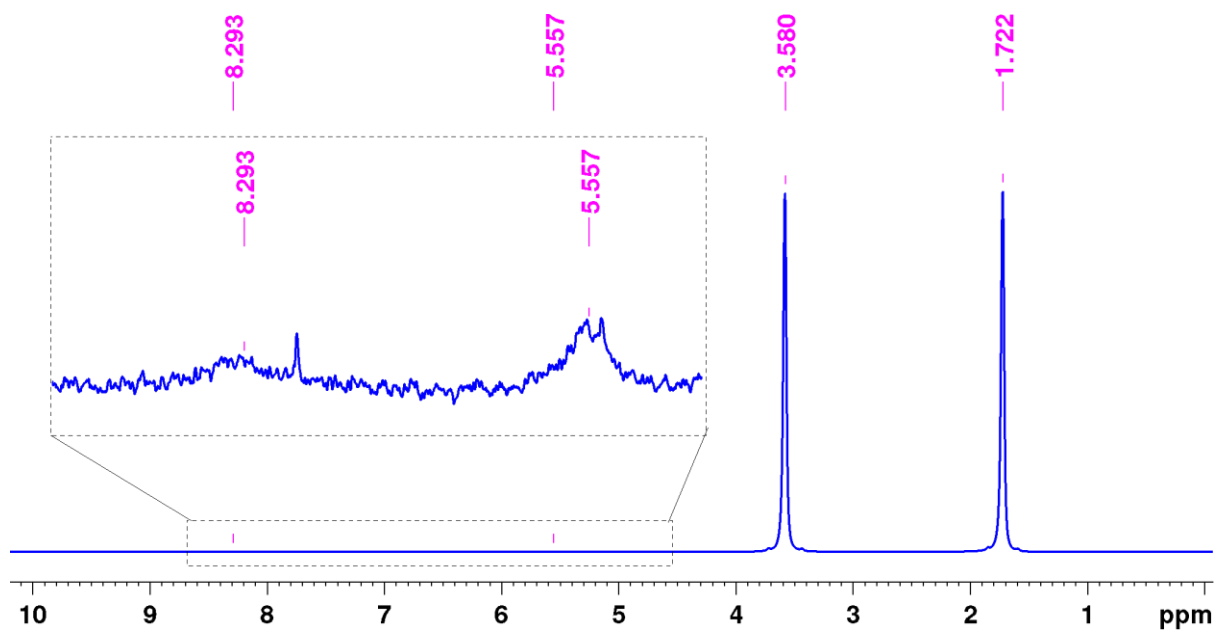

Fig. S12. <sup>2</sup>H NMR spectrum of **C1.D** in THF-D<sub>8</sub>:THF (0.1:0.4 ml) solvent.

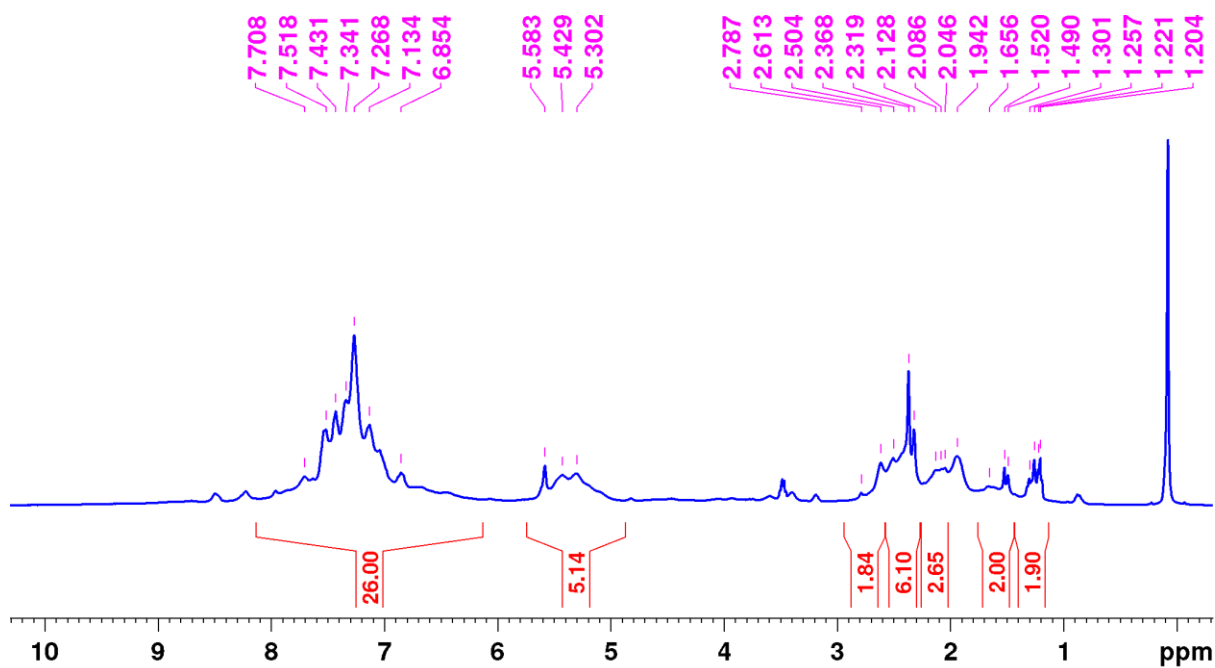

Fig. S13. <sup>1</sup>H NMR spectrum of **C1.D** in CDCl<sub>3</sub>.

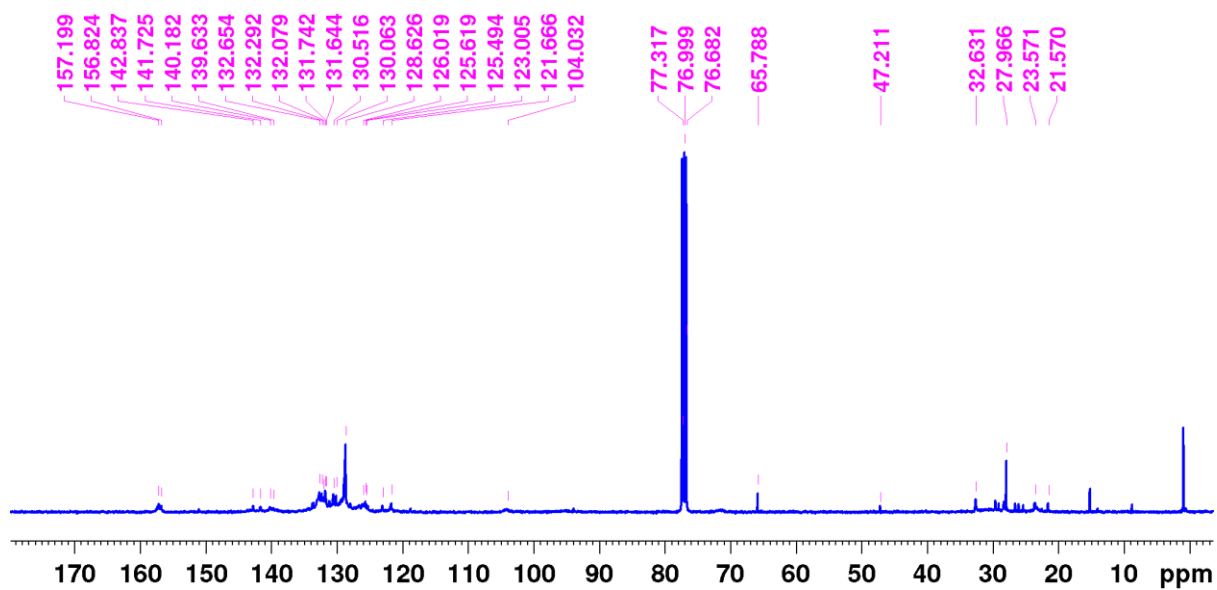

Fig. S14. <sup>13</sup>C NMR spectrum of **C1.D** in CDCl<sub>3</sub>.

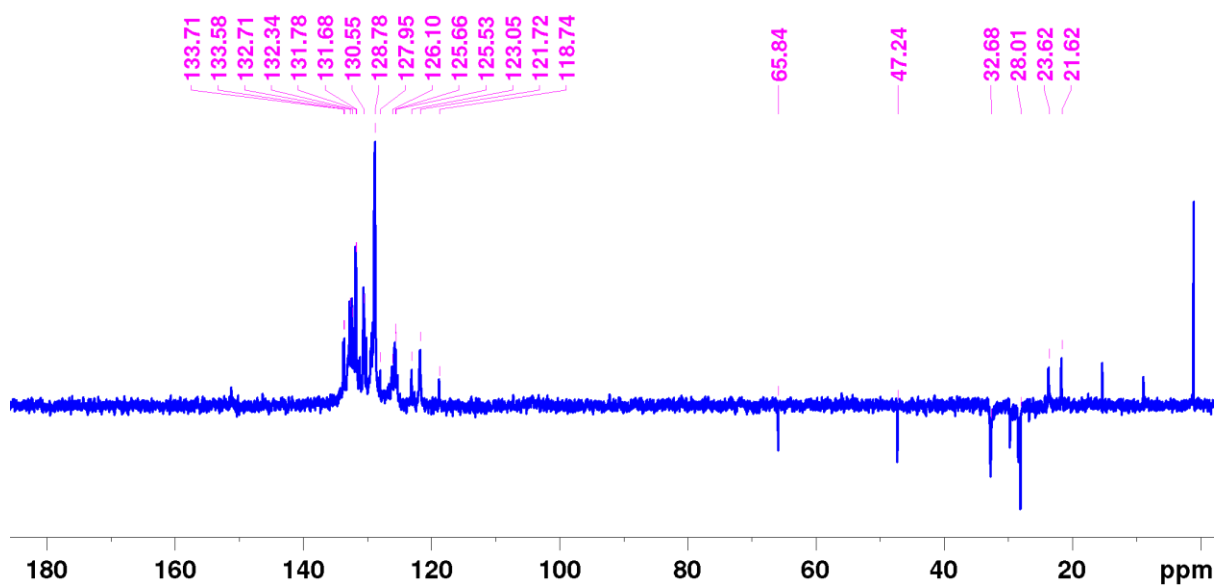

Fig. S15. <sup>13</sup>C NMR (DEPT) spectrum of **C1.D** in CDCl<sub>3</sub>.

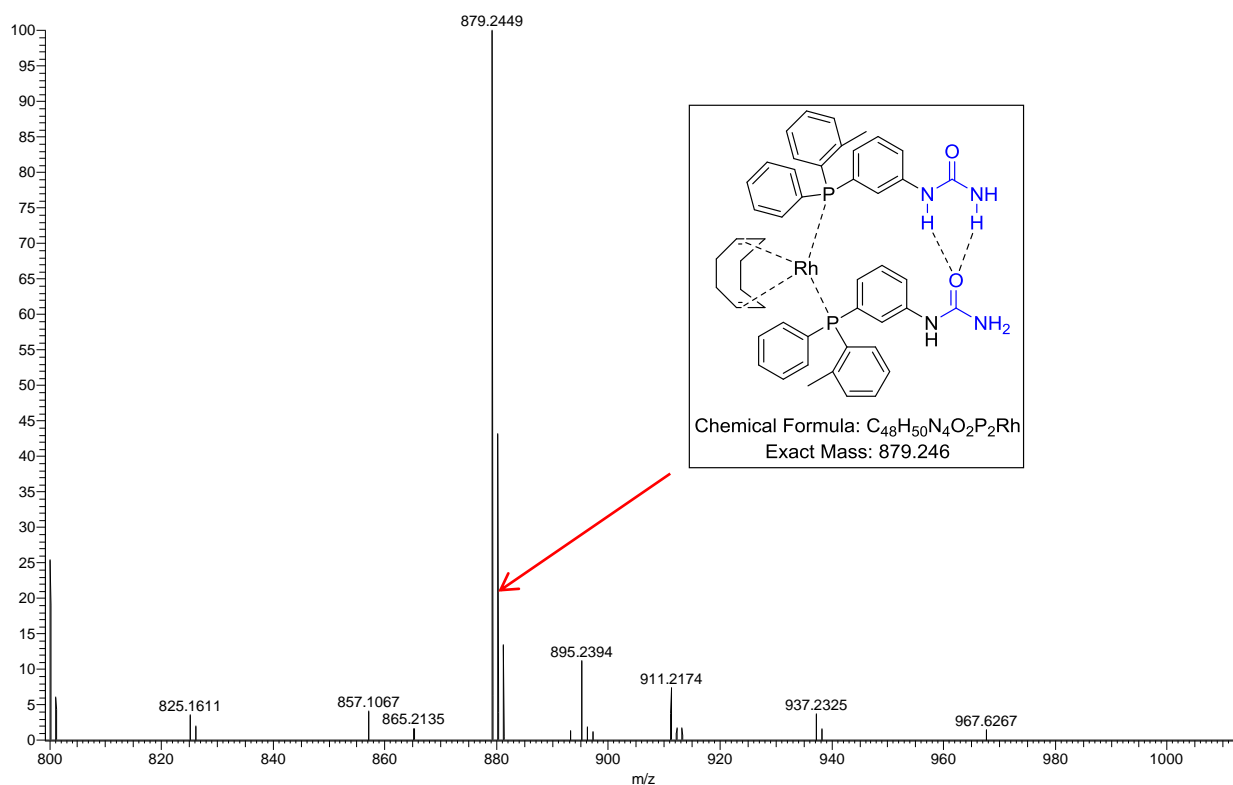

Fig. S16. ESIMS (+ve mode) spectrum of **C1.D**.

## 5. Stoichiometric study of self-assembled Rh-complex and **S2**

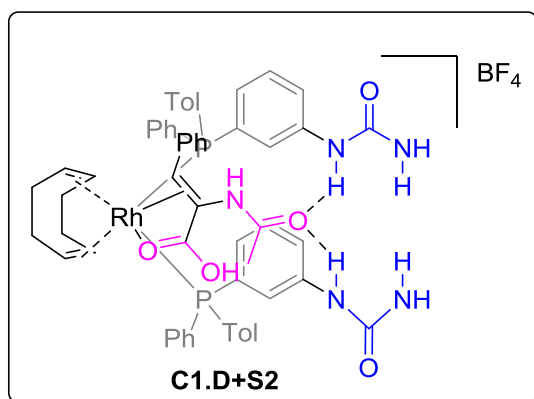

In the NMR tube **C1** 0.0048 g, 0.005 mmol was dissolved in  $CD_3CN$  to make 10 mM solution. The  $NH_2$  proton chemical shift was confirmed by  $^1H$  NMR (ESI S17). In the same NMR tube **S2** 0.010 g, 0.005 mmol was added and  $^1H$  NMR was measured (see in ESI S18). Similar experiment was done with deuterium labeled self-assembled Rh-

complex (**C1.D**) and **S2**, and  $^2H$  NMR was recorded in THF- $d_3$ :THF (0.1:0.4 ml) solvent. For this experiment deuterium labeled self-assembled Rh-complex **C1.D** (0.0048 g, 0.005 mmol) was dissolved in THF- $d_3$ :THF (0.1:0.4 ml) to prepare 10 mM solution and  $^2H$  NMR was measured to confirm the chemical shift of ND and ND<sub>2</sub>. After that **S2** (0.010 g, 0.005 mmol) was added in the same NMR tube and  $^2H$  NMR was recorded (see in ESI S17-S21).

$^2\text{H}$  NMR (500 MHz, THF- $d_8$ , 298 K)  $\delta$  = 8.45 (s,  $ND$ ), 5.61 (s,  $ND_2$ ).  $^1\text{H}$  NMR (400 MHz,  $\text{CD}_3\text{CN}$ , 298 K)  $\delta$  = 7.81-7.10 (m, 33H, Ar and  $NH$ ), 5.10-4.10 (m, 9H,  $CH$  and  $NH_2$ ), 2.41 (m, 4H,  $CH_2$ ), 2.12 (m, 9H,  $CH_3$ ), 1.53 (m, 2H,  $CH_2$ ), 1.27 (m, 2H,  $CH_2$ ). ESI-MS (+ve) (For  $\text{C}_{59}\text{H}_{55}\text{D}_4\text{LiN}_5\text{NaO}_5\text{P}_2\text{Rh}$ )  $m/z$  = 1116.24  $[\text{M}]^+$ .

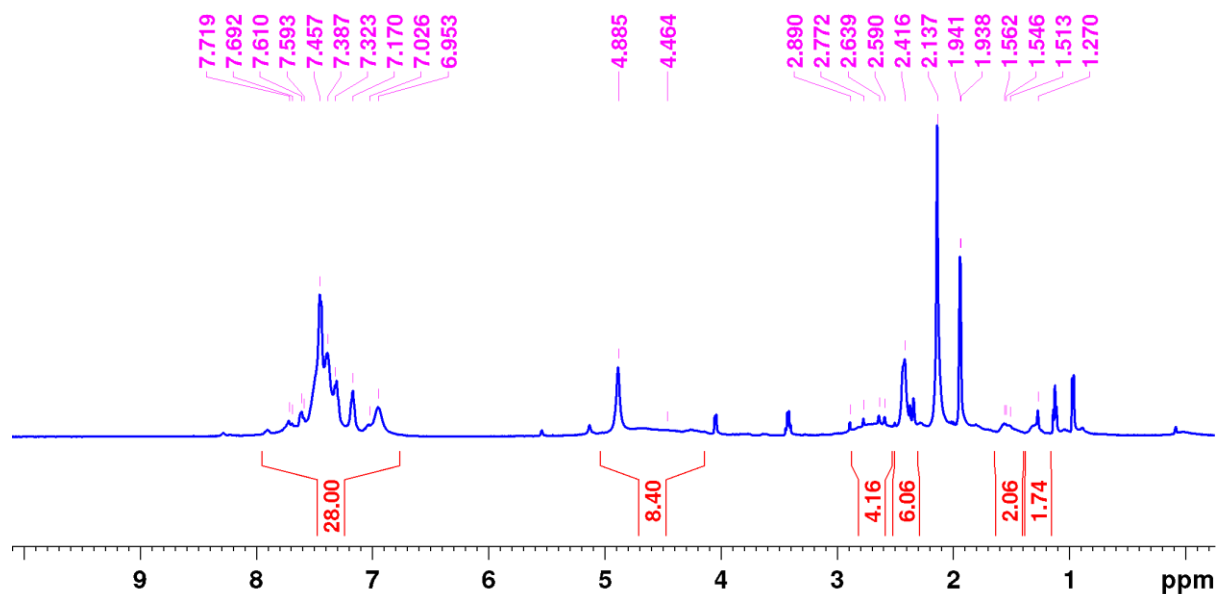

Fig. S17.  $^1\text{H}$  NMR spectrum of **C1** in  $\text{CD}_3\text{CN}$ .

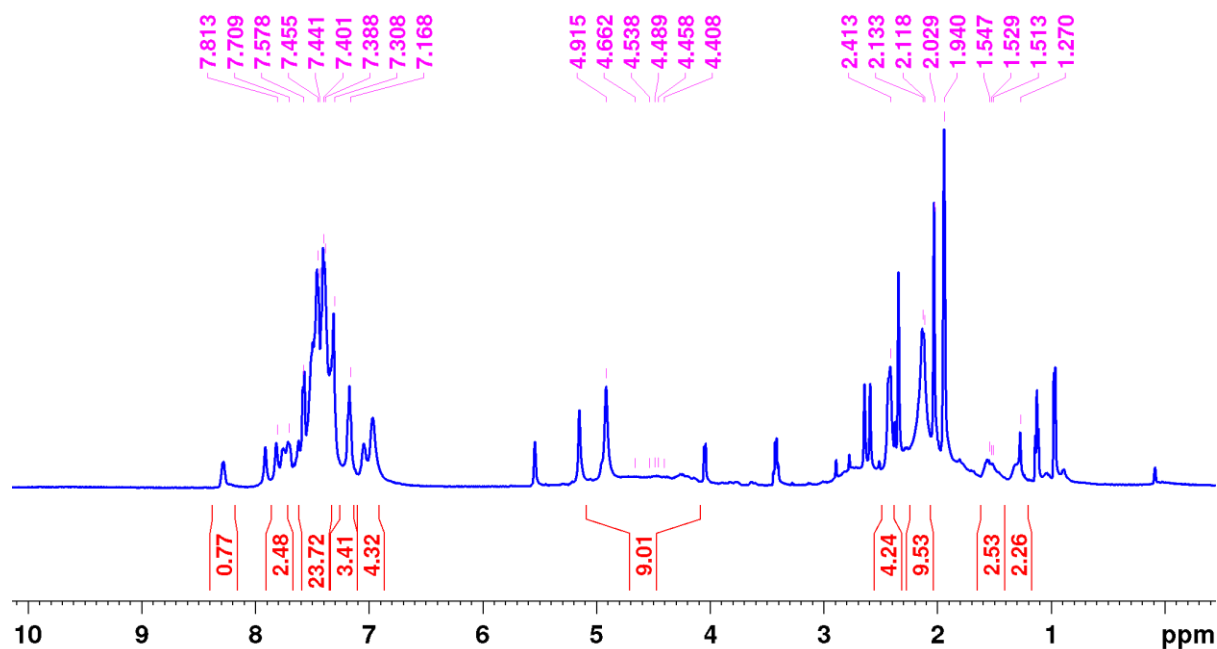

Fig. S18.  $^1\text{H}$  NMR spectrum of self-assembled Rh-complex **C1+S2** in  $\text{CD}_3\text{CN}$ .

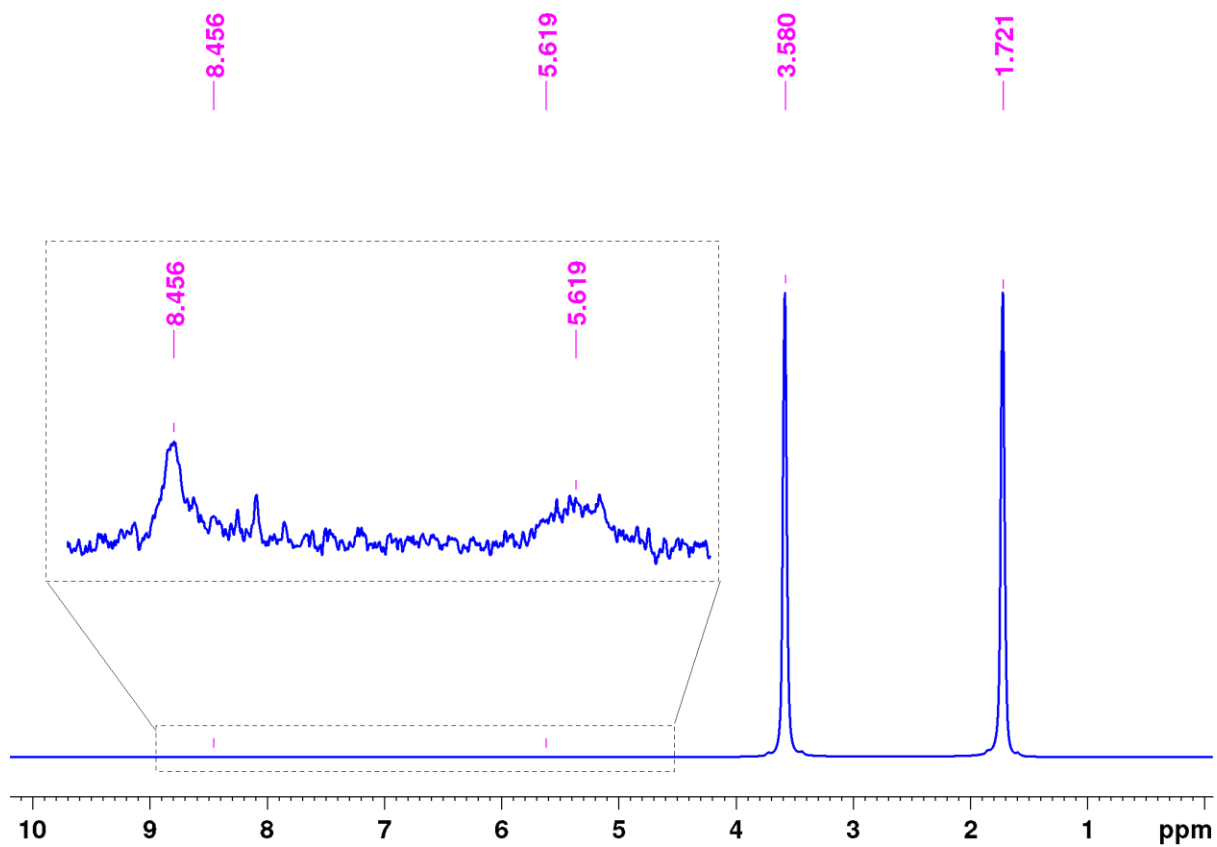

Fig. S19.  $^2\text{H}$  NMR spectrum of **C1.D+S2** in  $\text{THF-D}_8:\text{THF}$  (0.1:0.4 ml) solvent.

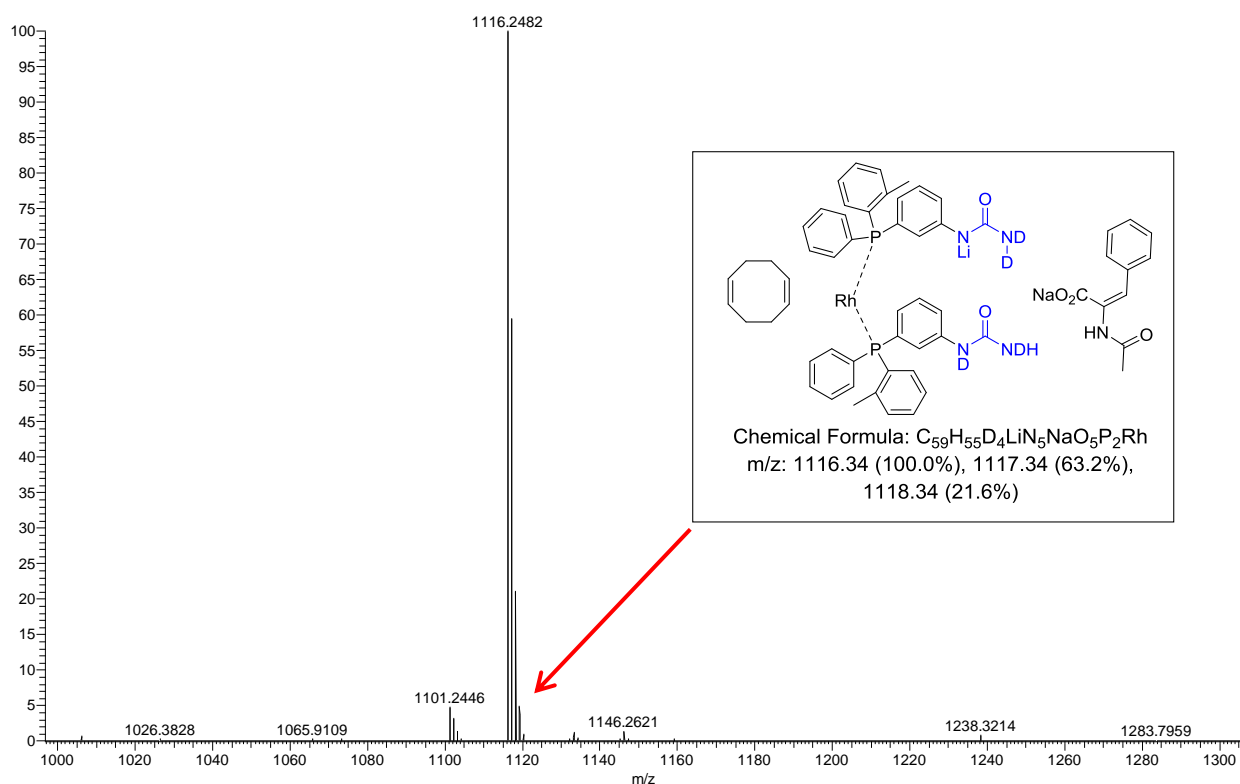

Fig. S20. ESI-MS (+ve mode) spectrum of C1.D+S2.

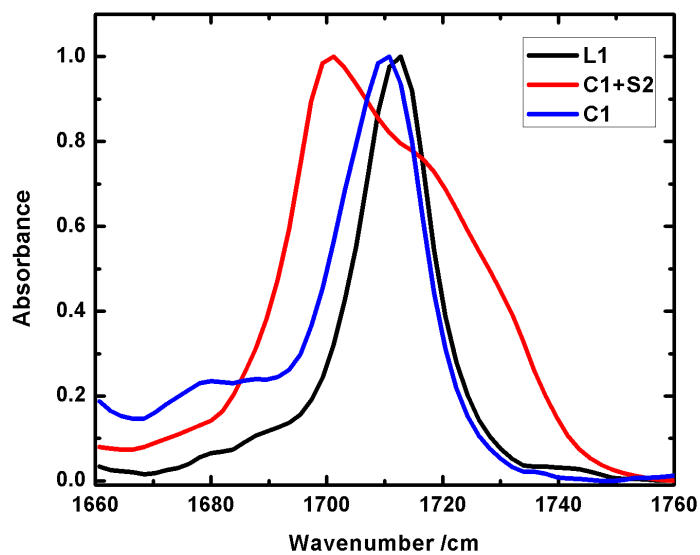

Fig. S21. Stacked IR spectra of ligand **L1** (black), self-assembled complex **C1** (blue) and complex **C1** + substrate **S2** (red).



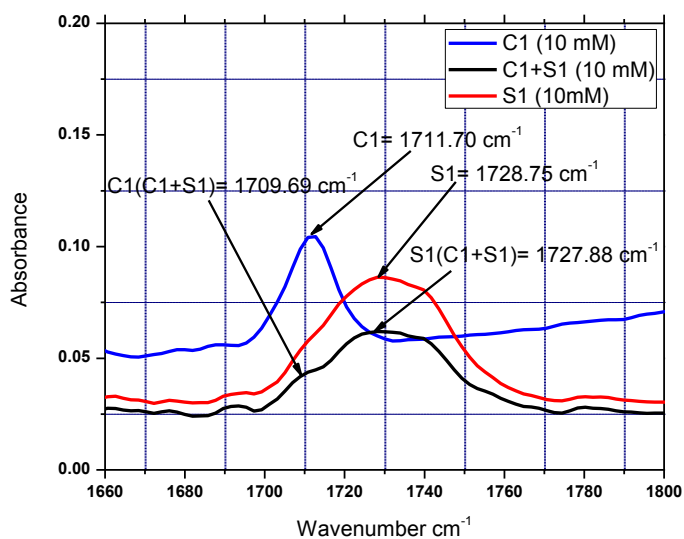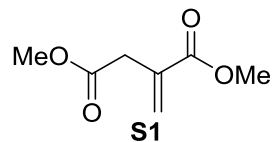

22Fig. S22. IR spectrum of neat **C1**, neat **S1** and stoichiometric experiment of **C1+S1**.

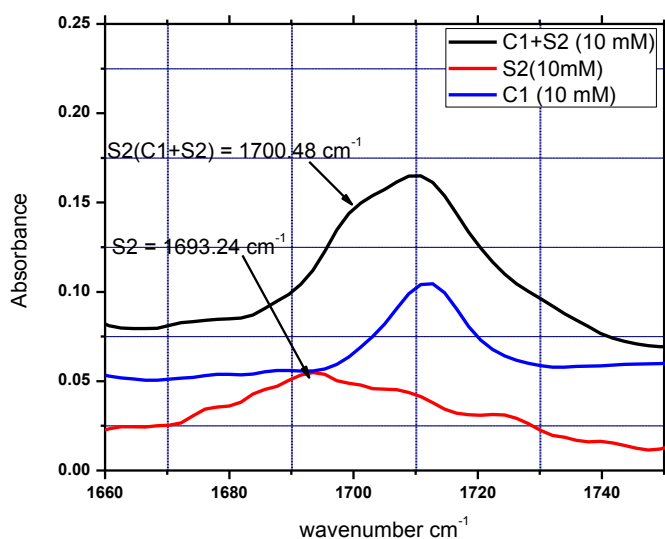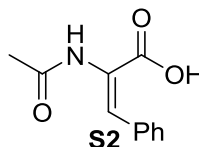

Fig. S23. IR spectrum of neat **C1**, neat **S2** and stoichiometric experiment of **C1+S2**.

## 6. References:

- 1) D. D. Perrin, W. L. Armarego, L. F. Willfred, Purification of Laboratory Chemicals, Pergamon, Oxford, 1988.
- 2) V. S. Koshti, N. R. Mote, S. Chikkali, *Organometallics*, 2015, **34**, 4802.
